# Supplementary material for: Reduced Vessel Density in the Mid-Periphery and Peripapillary Area of the Superficial Capillary Plexus in Non-Proliferative Diabetic Retinopathy
Source: MDPI journal article supplement (doi:10.3390/jcm11030532), 2022-01-21
Supplement: s1 [file s1]

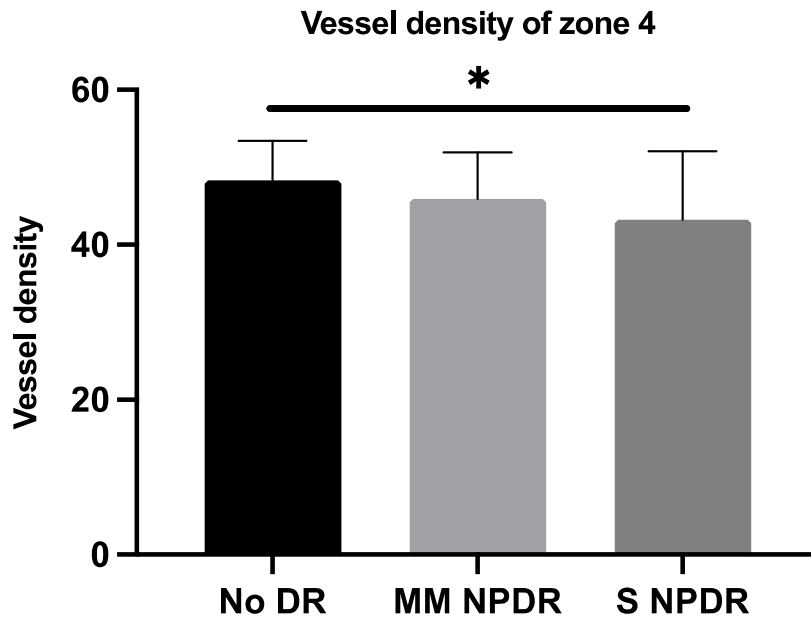

Figure S1. Mean vessel density with standard deviation for each group (without DR, mild and moderate NPDR, and severe NPDR) in zone 4, sub-analysis on 56 eyes of 56 patients (one eye included per patient). \*  $p < 0.05$ . DR = diabetic retinopathy; MM NPDR = mild and moderate non proliferative diabetic retinopathy; S NPDR = severe non proliferative diabetic retinopathy.

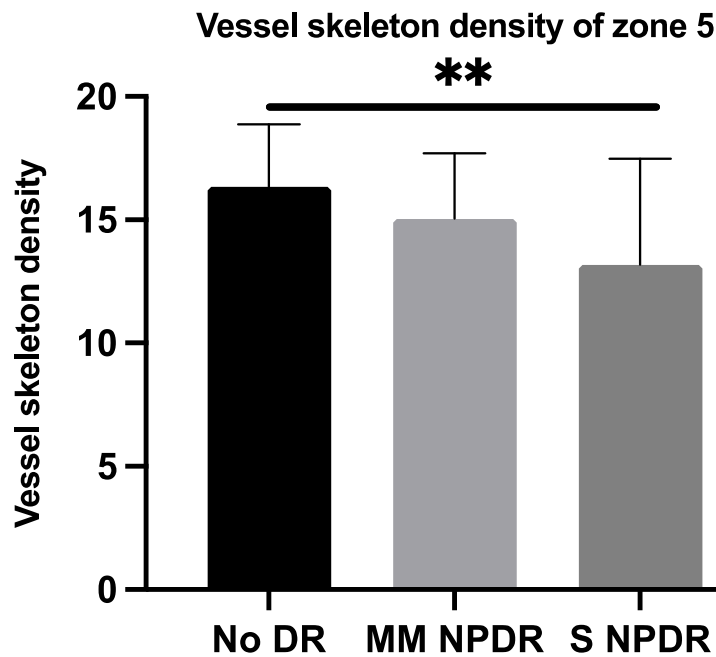

Figure S2. Mean vessel skeleton density with standard deviation for each group (without DR, mild and moderate NPDR, and severe NPDR) in zone 5, sub-analysis on 56 eyes of 56 patients (one eye included per patient). \*\*  $p < 0.01$ . DR = diabetic retinopathy; MM NPDR = mild and moderate non proliferative diabetic retinopathy; S NPDR = severe non proliferative diabetic retinopathy.

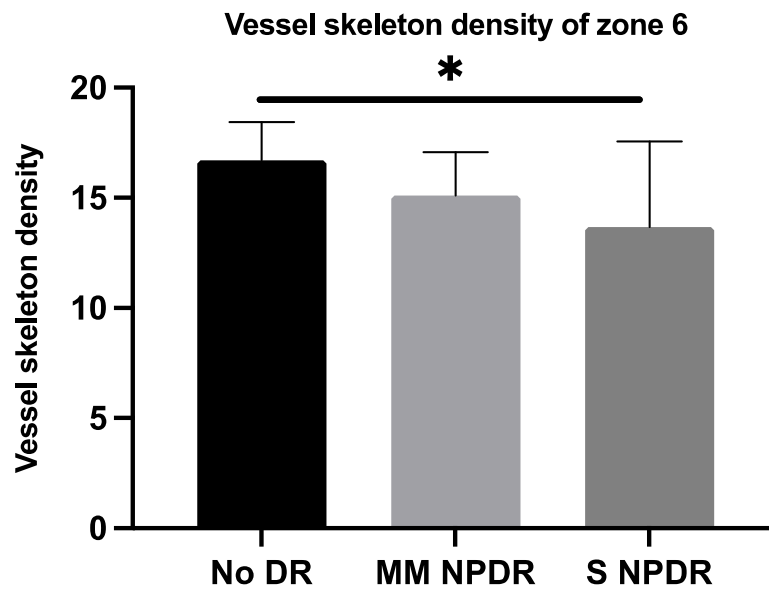

**Figure S3.** Mean vessel skeleton density with standard deviation for each group (without DR, mild and moderate NPDR, and severe NPDR) in zone 6, sub-analysis on 56 eyes of 56 patients (one eye included per patient). \*  $p < 0.05$ . DR= diabetic retinopathy; MM NPDR = mild and moderate non proliferative diabetic retinopathy; S NPDR= severe non proliferative diabetic retinopathy.
